# Supplementary material for: Combining the antianginal drug perhexiline with chemotherapy induces complete pancreatic cancer regression in vivo
Source: PubMed Central journal article supplement — iScience. 2023 May 19;26(6):106899. doi: 10.1016/j.isci.2023.106899 (PMC10250830; doi:10.1016/j.isci.2023.106899), 2023-05-19
Supplement: mmc1.pdf [file mmc1.pdf]

**Supplemental information**

**Combining the antianginal drug perhexiline  
with chemotherapy induces complete  
pancreatic cancer regression *in vivo***

**Gabriela Reyes-Castellanos, Nadine Abdel Hadi, Scarlett Gallardo-Arriaga, Rawand Masoud, Julie Garcia, Sophie Lac, Abdessamad El Kaoutari, Tristan Gicquel, Mélanie Planque, Sarah-Maria Fendt, Laetitia Karine Linares, Odile Gayet, Fabienne Guillaumond, Nelson Duseti, Juan Iovanna, and Alice Carrier**

**A**

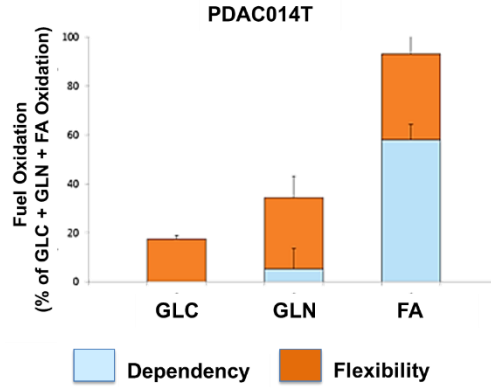

**B**

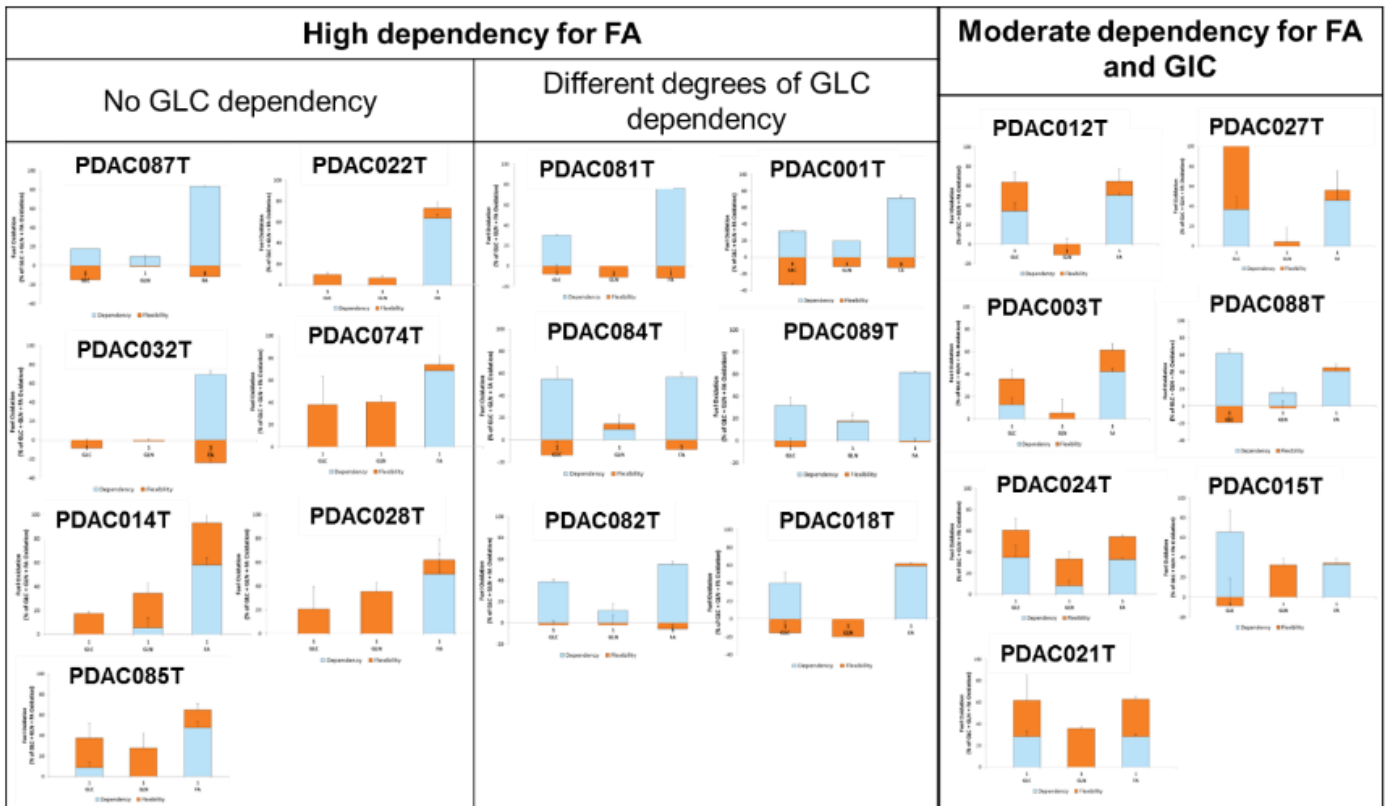

**C**

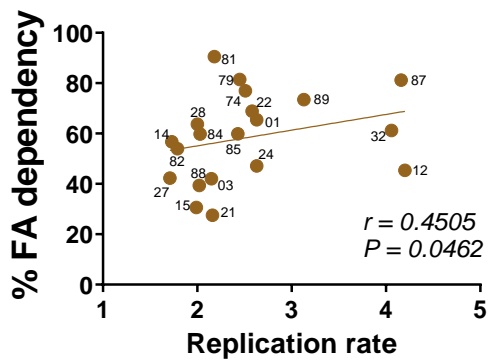

**Figure S1. Mitochondrial respiration of primary pancreatic cancer cells depends mainly on the Fatty Acid Oxidation (FAO) pathway (related to Figure 1).** (A) Mitochondrial dependency and flexibility to oxidize three main energetic fuels: glucose (GLC), glutamine (GLN), and long-chain fatty acids (FA). Example of one primary PDAC cell. The rate of oxidation is expressed in percentage. (B) We addressed the mitochondrial dependency towards GLC, GLN, and FA, in 21 primary PDAC cells. Our results led us to classify them in two main groups. The first group consist in cells with high dependency on FA with no GLC dependence or different degrees of GLC dependency. The second group (one third of the total) consist in cells with moderate dependency for FA and GLC. The Perhexiline high responder xenograft PDAC084T (showing *in vivo* complete tumor regression induced by combination treatment in this study) is found in the high FA dependency group with moderate dependency for GLC. The Perhexiline low responder cells PDAC022T and PDAC032T are found in the high FA dependency group with no GLC reliance. Interestingly, the percentage of glutamine dependency is very low in all the tested cells. The graphs shown are representative of three independent experiments performed in triplicate, and data are the mean  $\pm$  SD. (C) The FAO dependency of PDAC cells is related to their proliferation rate. The replication rate of each primary PDAC cell has been reported in our previous publication <sup>S1</sup>. The scatterplot displays the replication rate and the percentage of FA dependency from Figure 1B. Spearman's correlation coefficient and p value are shown, indicating statistically significant association between the two variables.

**A**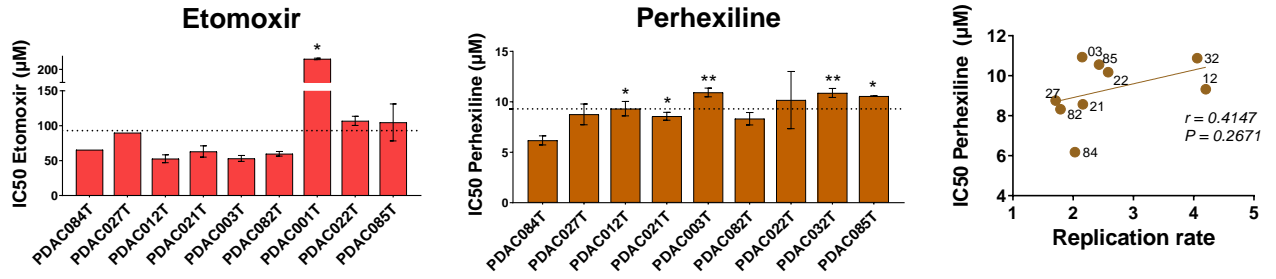**B**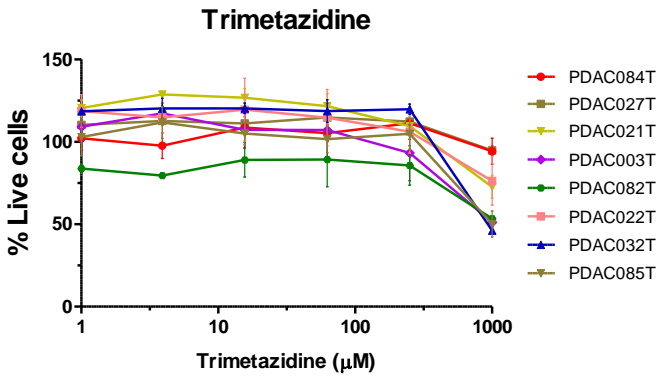**C**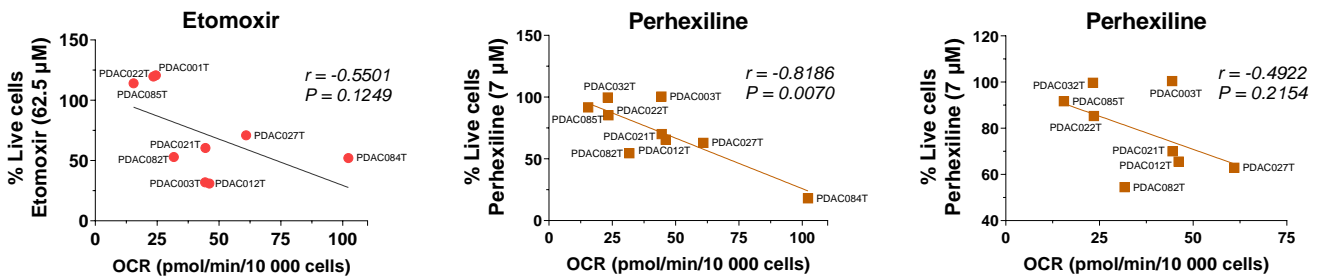**D**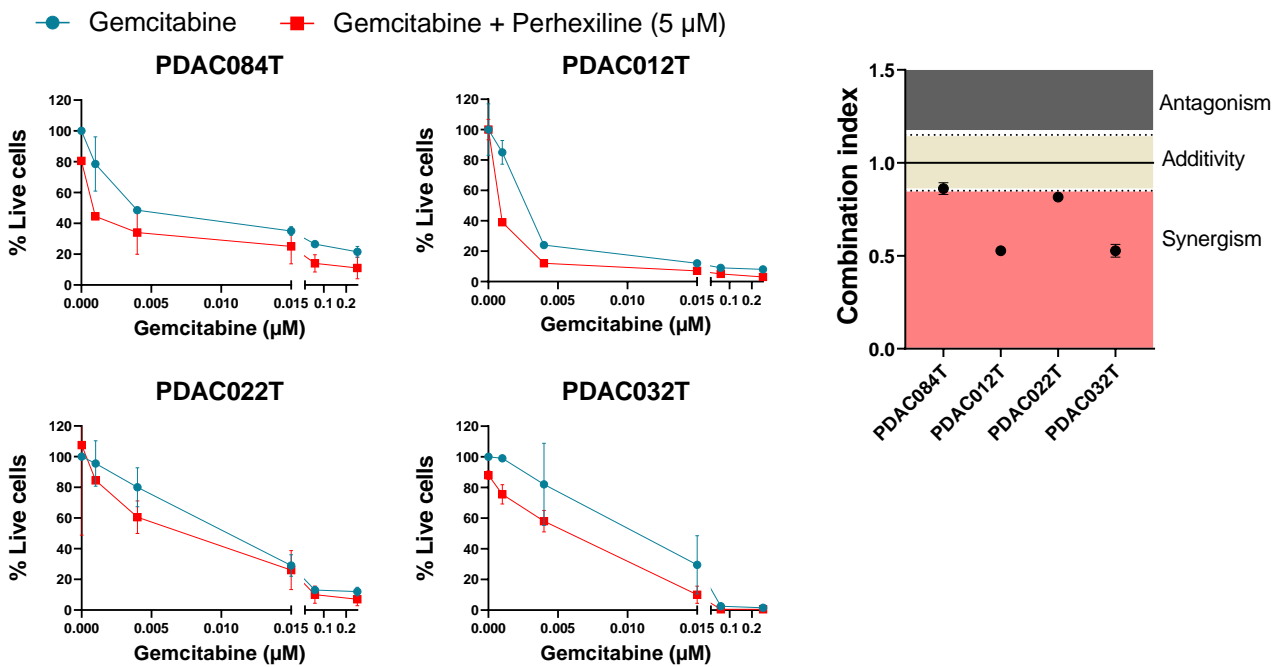

**Figure S2. Primary PDAC cells exhibit different sensitivities to FAO inhibitors, and the OXPPOS rates correlate with response to Perhexiline (related to Figure 2).** (A) IC<sub>50</sub> graphs of treatments with Etomoxir and Perhexiline. Data correspond to the mean ( $\pm$  SEM) of at least 2 independent experiments performed in triplicates, and the dot line is the average of the total of values. Unpaired t Test was used to calculate statistical significance \*  $p < 0.05$ , \*\*  $p < 0.01$ . (Right) The Perhexiline sensitivity of PDAC cells is not related to their proliferation rate. The scatterplot displays the replication rate and the Perhexiline IC<sub>50</sub>. Pearson's correlation coefficient and p value are shown, indicating non-significant association between the two variables. (B) Dose-response curve of Trimetazidine treatment in primary PDAC cells. This curve is representative of two independent experiments performed in triplicate and data are the mean  $\pm$  SD. (C) Scatterplots showing a negative correlation between the percentage of live cells treated with Perhexiline or Etomoxir and the basal mitochondrial respiration (Oxygen Consumption Rate, OCR) reported previously<sup>S1</sup>. The correlation between response to Perhexiline and OCR is statistically significant. The significance is lost when the high OXPPOS PDAC084T is excluded from the scatterplot (graph on the right). Pearson correlation and two tailed test were used. (D) (Left) Dose-response curves of PDAC cells treated with Gemcitabine with or without Perhexiline at low concentration (5  $\mu$ M that alone has no impact on cell viability). (Right) Calculation of the combination index with the Chou and Talalay method for the 1 nM concentration of Gemcitabine, using two independent experiments.

**A** 6 h treatment:  
 ■ Vehicle (DMSO 0.05%) ■ Gemcitabine (1  $\mu$ M) ■ Perhexiline (10  $\mu$ M) ■ Combination

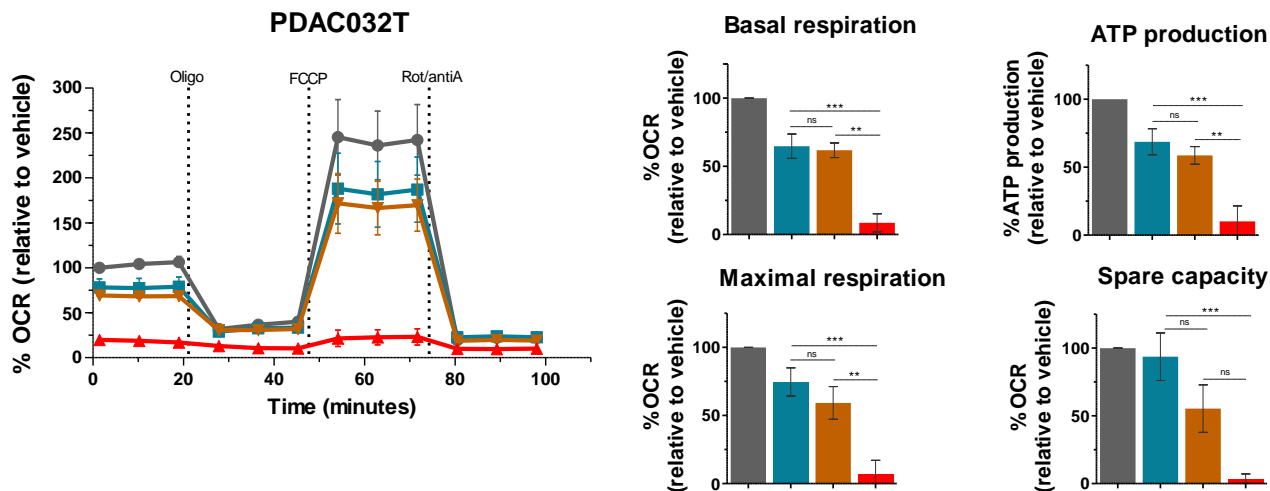

**B** **BODIPY 581/591-C11**  
 ratio GFP:dsRED

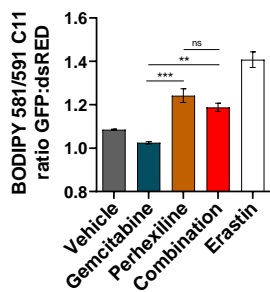

**C** 16 h treatment:  
 ■ Controls ■ Gemcitabine (1  $\mu$ M) ■ Perhexiline 5 ( $\mu$ M) ■ Combination

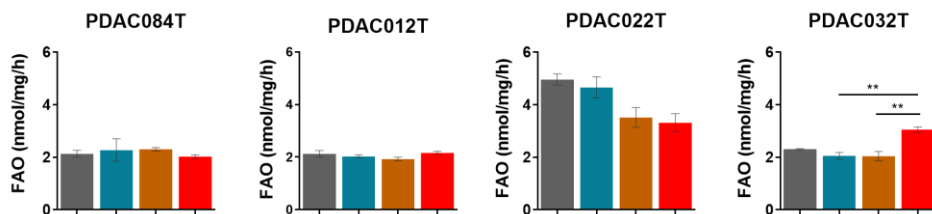

**D** Octanoate supplementation in PDAC084T cells

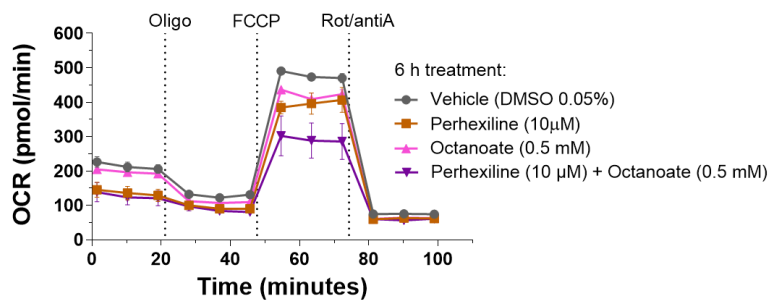

Sodium acetate supplementation in PDAC084T cells

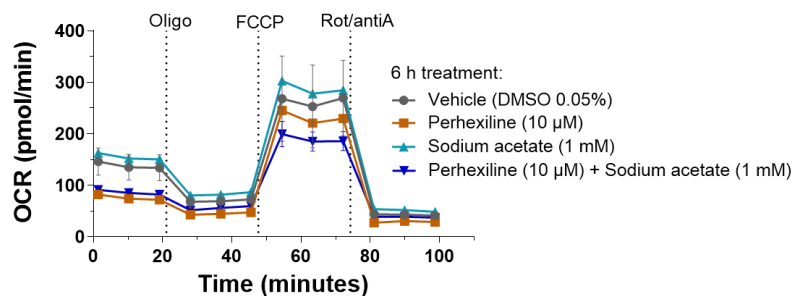

**Figure S3. The combination of Gemcitabine with Perhexiline enhances the energetic and oxidative stress induced by Perhexiline in primary pancreatic cancer cells, independently of FAO inhibition (related to Figure 3).** **(A)** Mitochondrial respiration (Oxygen Consumption Rate, OCR) was measured on a Seahorse oxygraph in PDAC032T cells after 6 hours of Gemcitabine (1  $\mu$ M), Perhexiline (10  $\mu$ M), or combination treatments at same dose that drugs alone. DMSO (0.05%) was used as vehicle for the controls. The basal and maximal respiration, ATP production by mitochondria, and spare respiratory capacity were calculated. Values are presented as percentage of the vehicle-treated. Data are mean  $\pm$  SEM of three independent experiments performed in triplicates. p values calculated from One-Way ANOVA test; \*\* p<0.01, \*\*\* p<0.001. **(B)** PDAC084T cells were treated with Gemcitabine (1  $\mu$ M), Perhexiline (7  $\mu$ M) or the combination for 24 hours, and processed for flow cytometry to quantify lipid peroxidation using BODIPY 581/591 C11 staining. Cells treated with Erastin (2  $\mu$ M) were used as positive controls. We measured the two forms of the probe, the reduced (dsRED) and oxidized form (GFP), then the ratio oxidized/reduced was calculated as shown. Data are mean of three independent experiments  $\pm$  SEM performed in duplicates. p values calculated from One-Way ANOVA test; \*\* p<0.01, \*\*\* p<0.001. **(C)** FAO measurement by labeling with  $^3$ H-palmitate and quantification of  $^3$ H $_2$ O. Perhexiline treatment is not decreasing FAO level except in PDAC022T cells. Data are mean of two independent experiments  $\pm$  SEM performed in duplicates. p values calculated from Two-Way ANOVA test; \*\* p<0.01 **(D)** OCR was measured on a Seahorse oxygraph 6 h after treatment with Perhexiline (10  $\mu$ M) or DMSO control, with or without supplementation with either octanoate 0.5 mM (Top) or sodium acetate 1 mM (Bottom). Same experiments were done with other concentrations of octanoate (0.1, 1, and 5 mM) and sodium acetate (2 and 5 mM) with similar outcome. No rescue of Perhexiline-induced OCR decrease was observed indicating that it could not be due to FAO inhibition.

**A**

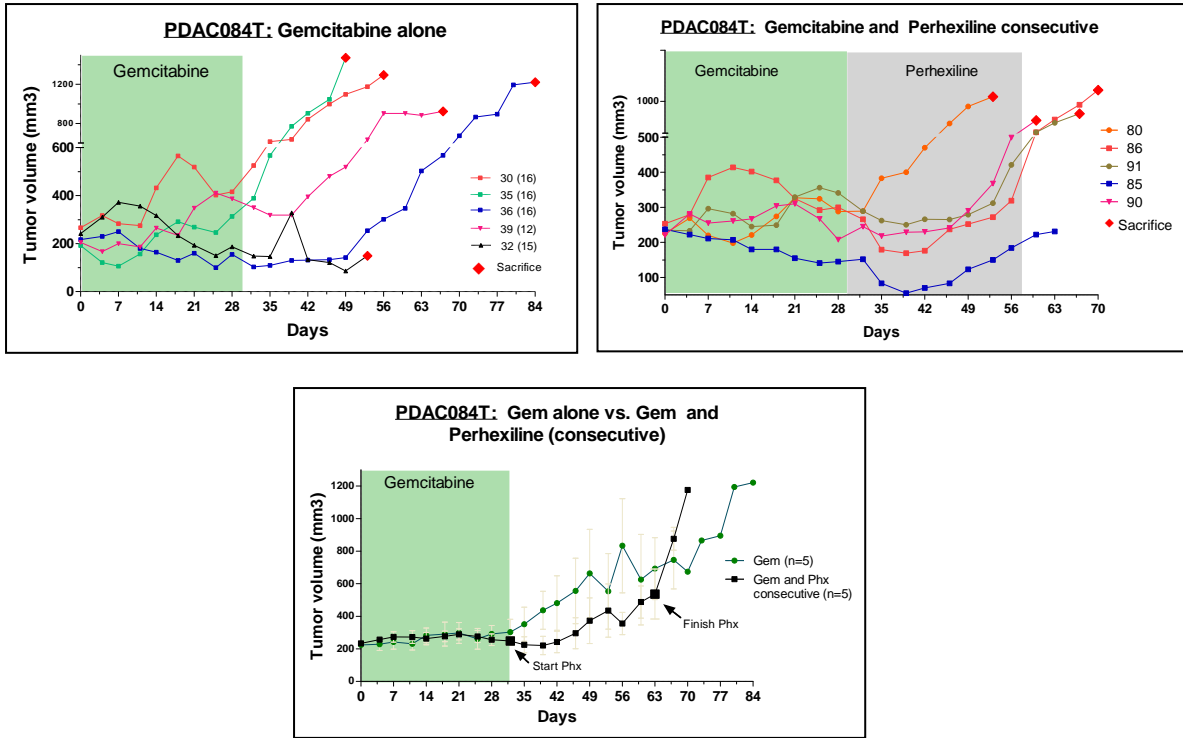

**B**

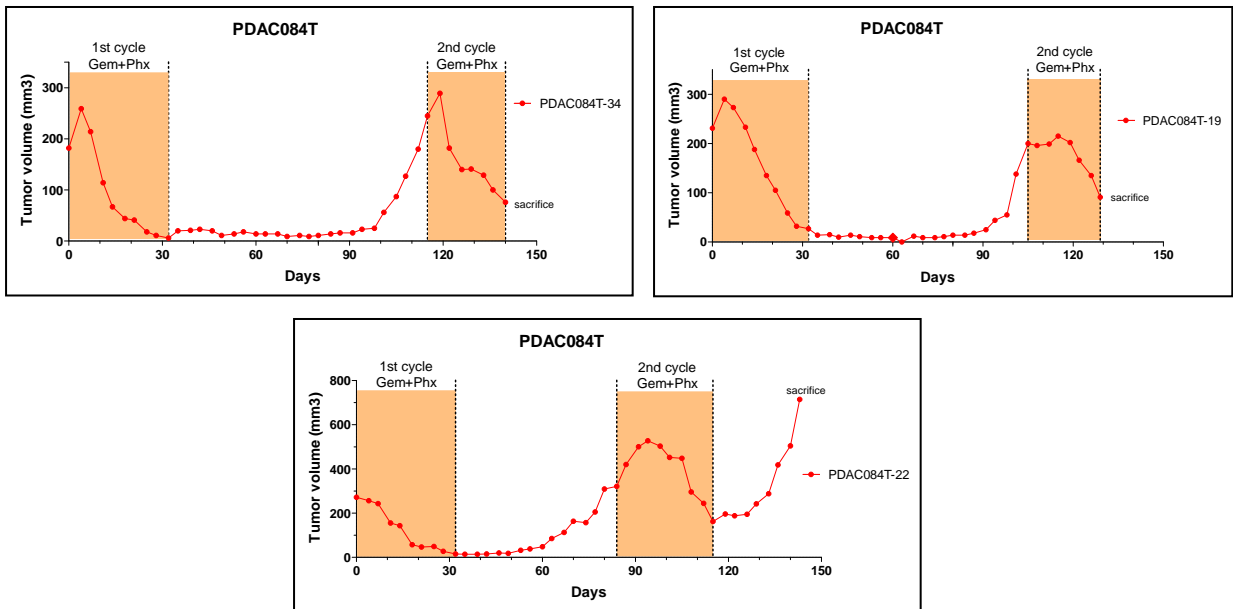



**Figure S4. Efficacy of Perhexiline treatment in combination with Gemcitabine in a sequential therapeutic scheme, and in a relapse context (related to Figure 4A).** **(A)** We aimed to compare the efficacy of the combination treatment of Gemcitabine with Perhexiline in a simultaneous or sequential administration in the PDAC084T xenograft model. For the sequential administration, we treated a cohort of mice with Gemcitabine alone during one month, followed by Perhexiline treatment alone also for one month. Interestingly, we observed that this sequential therapeutic strategy does not induce complete tumor regression contrary to a simultaneous treatment; however, it seems to delay the tumor growth in comparison with the sole Gemcitabine therapy. **(B)** The xenograft model PDAC084T show complete tumor regression upon Gemcitabine plus Perhexiline treatment for one month. Then, we monitored the mice after the tumor regression, and we found out that tumors relapsed after a certain period of time. To address the potential of our combination therapeutic strategy in this relapse context, we treated the tumor-bearing mice with a second cycle of Perhexiline and Gemcitabine. Remarkably, we observed that the tumors remain sensitive to the combination strategy (these mice were sacrificed before one-month treatment for *ex vivo* analysis).

Enriched Pathways | KEGG

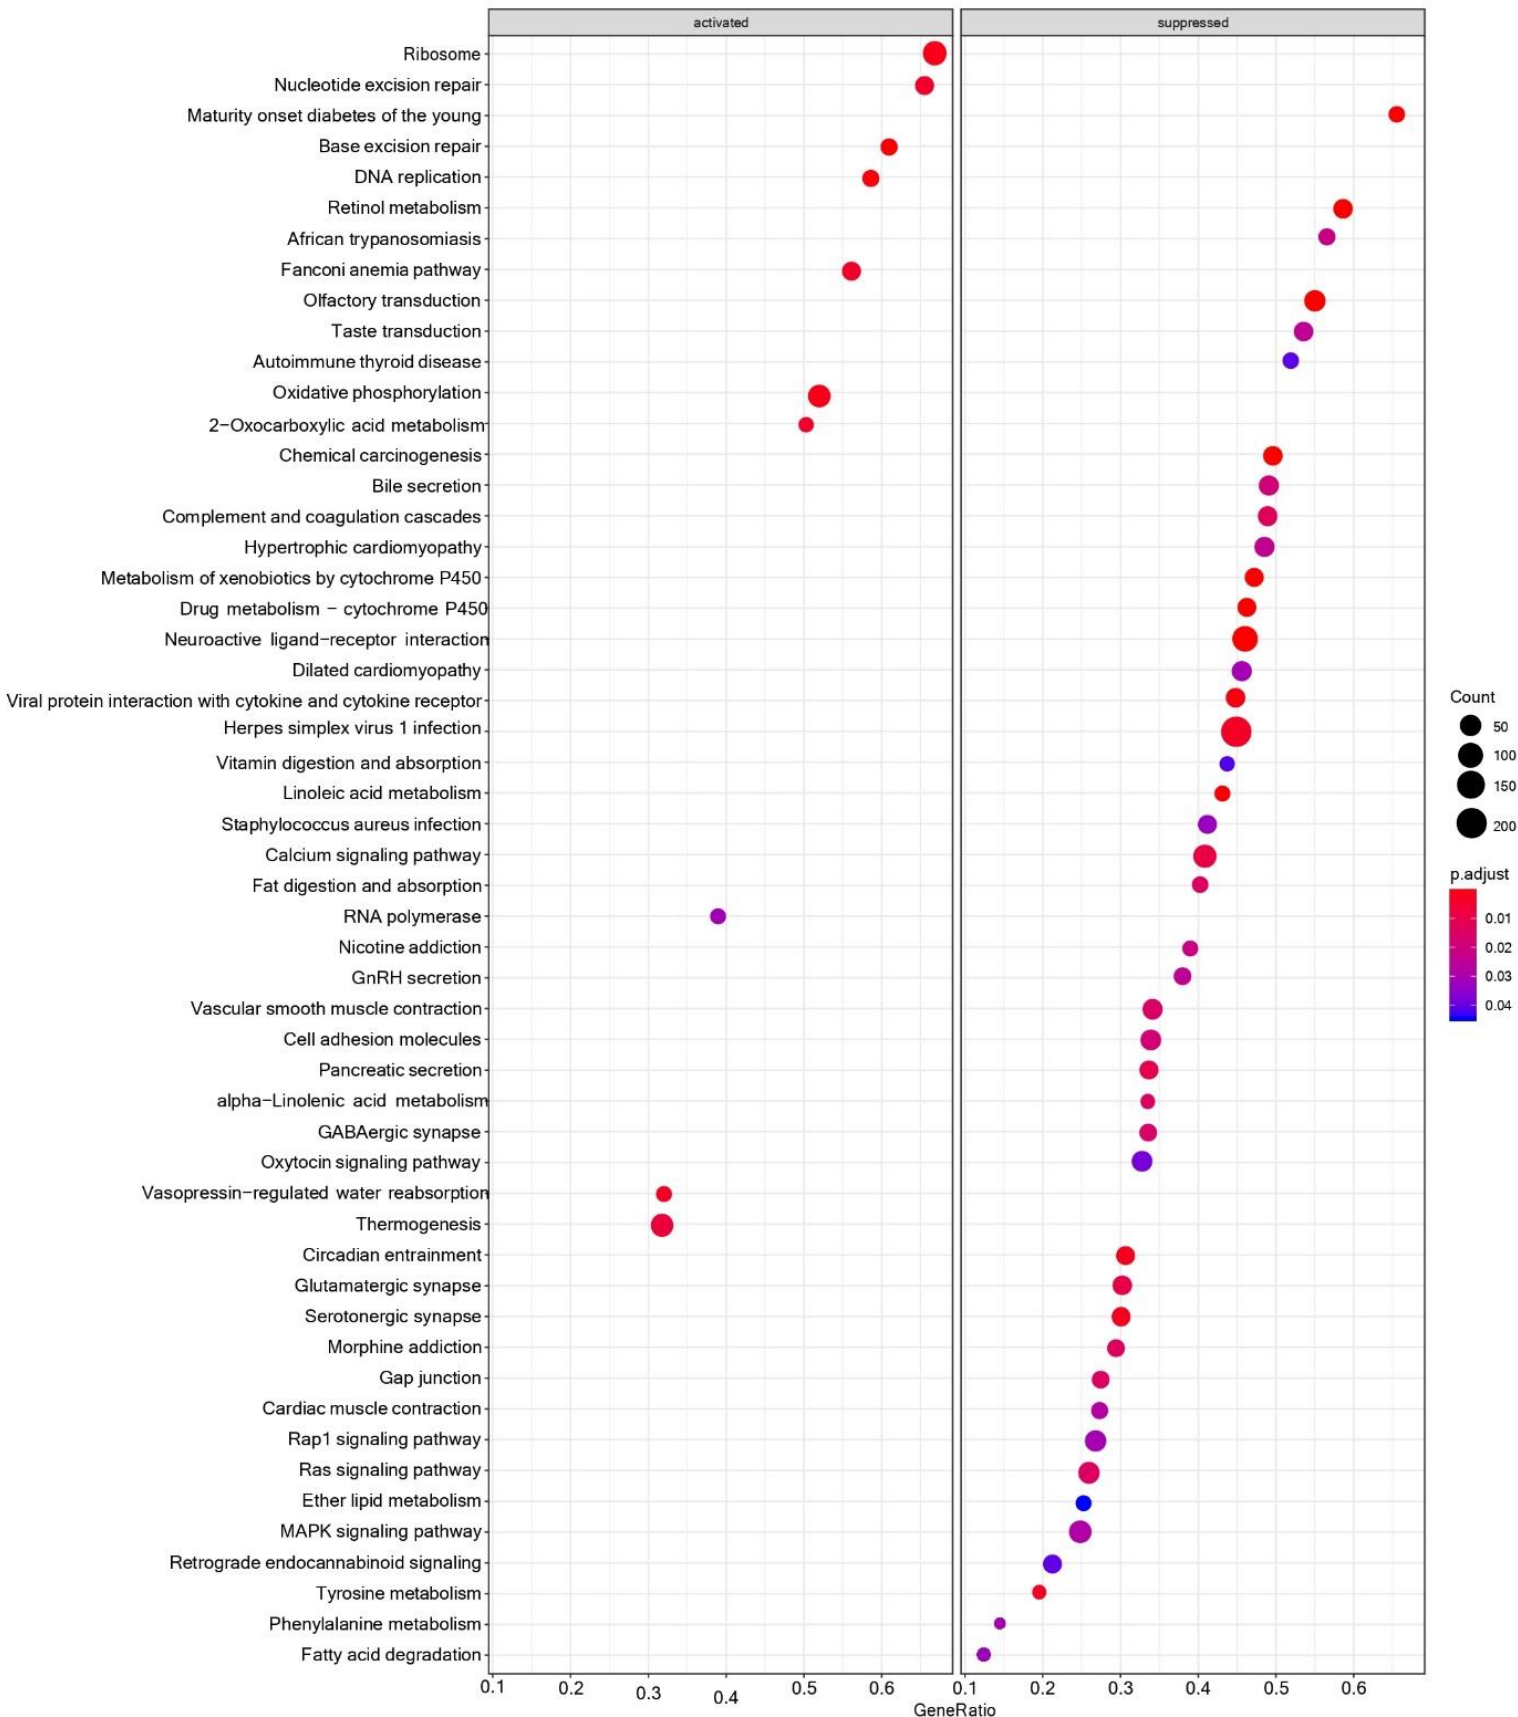

**Figure S5. Significantly enriched pathways in PDAC cells comparing high responders to Perhexiline versus low responders (related to Figure 5A).** Transcriptomic analysis of significantly enriched activated and suppressed KEGG pathways. The vertical items are the names of KEGG terms. The depth of the color represents the adjusted p-value and the area of circle in the graph means gene counts.



**Figure S6. Fatty acid metabolomic analysis in PDAC cells comparing high responders to Perhexiline versus low responders (related to Figure 5A and S5).** Heatmap representing fatty acids abundance comparing the high versus low responder groups to Perhexiline treatment. Red and blue colors indicate positive and negative correlation, whereas the white color indicates the absence of correlation. SFAs = Saturated fatty acids, MUFAs = Monounsaturated fatty acids, PUFAs = Polyunsaturated fatty acids.

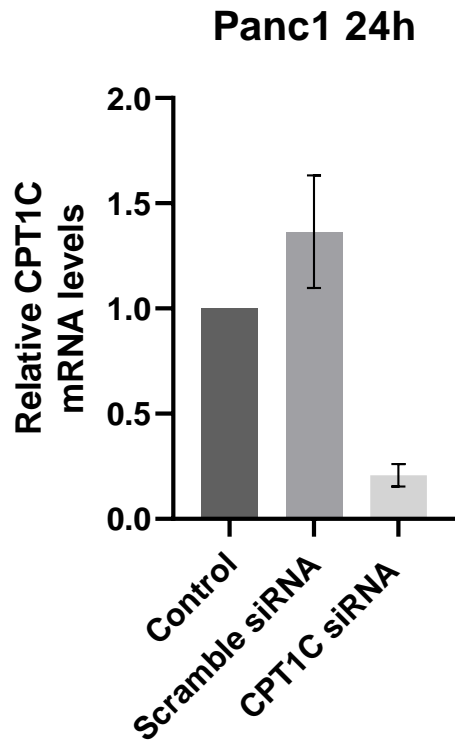

**Figure S7. CPT1C downregulation in siRNA-transfected Panc-1 cells (related to Figure 5F).** Cells were seeded and transfected in triplicates for 24 h, then pooled before performing RT-qPCR in triplicates to determine CPT1C mRNA levels. Data are mean ( $\pm$  SEM) of triplicates and representative of three independent assays.

**Table S1. Cell density of primary PDAC cells used for the Seahorse Mito Fuel Flex Test experiments (related to Figure 1 and S1A-B).**

| <b>Cell line</b> | <b>Cellular density</b> |
|------------------|-------------------------|
| PDAC001T         | 30 000                  |
| PDAC003T         | 30 000                  |
| PDAC012T         | 50 000                  |
| PDAC014T         | 40 000                  |
| PDAC015T         | 20 000                  |
| PDAC018T         | 15 000                  |
| PDAC021T         | 30 000                  |
| PDAC022T         | 40 000                  |
| PDAC024T         | 30 000                  |
| PDAC027T         | 20 000                  |
| PDAC028T         | 40 000                  |
| PDAC032T         | 40 000                  |
| PDAC074T         | 20 000                  |
| PDAC079T         | 30 000                  |
| PDAC081T         | 40 000                  |
| PDAC082T         | 30 000                  |
| PDAC084T         | 20 000                  |
| PDAC085T         | 40 000                  |
| PDAC087T         | 30 000                  |
| PDAC088T         | 40 000                  |
| PDAC089T         | 50 000                  |

**Supplemental reference**

- S1. Masoud, R., Reyes-Castellanos, G., Lac, S., Garcia, J., Dou, S., Shintu, L., Abdel Hadi, N., Gicquel, T., El Kaoutari, A., Diémé, B., et al. (2020). Targeting Mitochondrial Complex I Overcomes Chemoresistance in High OXPHOS Pancreatic Cancer. *Cell Reports Medicine* 1, 100143. 10.1016/j.xcrm.2020.100143.
